# Supplementary material
Source: PubMed Central journal article supplement (PMC5466444)
Supplement: NIHMS854260-supplement-4.pdf [file NIHMS854260-supplement-4.pdf]

## **CRISPR Knockout of the HuR Gene Causes a Xenograft Lethal Phenotype**

Shruti Lal<sup>\*1</sup>, Edwin C. Cheung<sup>\*1</sup>, Mahsa Zarei<sup>\*1</sup>, Ranjan Preet<sup>2</sup>, Saswati N. Chand<sup>1</sup>, Nicole C. Mambelli-Lisboa<sup>1</sup>, Carmella Romeo<sup>1</sup>, Matthew C. Stout<sup>3</sup>, Eric Londin<sup>4</sup>, Austin Goetz<sup>1</sup>, Cinthya Y. Lowder<sup>1</sup>, Avinoam Nevler<sup>1</sup>, Charles J. Yeo<sup>1</sup>, Paul M. Campbell<sup>3</sup>, Jordan M. Winter<sup>1</sup>, Dan A. Dixon<sup>2</sup> and Jonathan R. Brody<sup>1</sup>

\* Contributed equally (First authors)

<sup>1</sup>Department of Surgery, Division of Surgical Research; Jefferson Pancreas, Biliary and Related Cancer Center; Jefferson Medical College; Thomas Jefferson University, Philadelphia, PA, USA

<sup>2</sup>Department of Cancer Biology and University of Kansas Cancer Center, University of Kansas Medical Center, Kansas City, KS, USA

<sup>3</sup>Department of Pharmacology and Physiology, Drexel University College of Medicine, Philadelphia, PA, USA

<sup>4</sup>Computational Medicine Center, Sidney Kimmel Medical College, Thomas Jefferson University, Philadelphia PA, USA

**Figure S1: *HuR* inhibition was successfully achieved by CRISPR/cas9 system.** A, Schematic of CRISPR/Cas9 single plasmid and flow chart depicting strategy of the experiment. The U6 promoter is driving the expression of gRNA while CMV promoter is driving the expression of Cas9 which is fused with GFP via 2A peptide linkage at C terminus. GFP positive single cells were sorted by FACS analysis and sorted cell population were expanded and assessed for mutation by sequencing and verified by qPCR and western blot. *CRISPR-cas9 system successfully knockout *HuR* expression.* B, Relative *HuR* mRNA expression in all the clones was assessed by qPCR in MIA PaCa-2. C, Relative protein expression of *HuR* was assessed in all the clones by western blot in MIA PaCa-2. D, Sanger sequencing validation of mutation in Hs 766T CRISPR clones. E, Immunoblot showing complete *HuR* inhibition after CRISPR knockout in Hs 766T CRISPR clones.

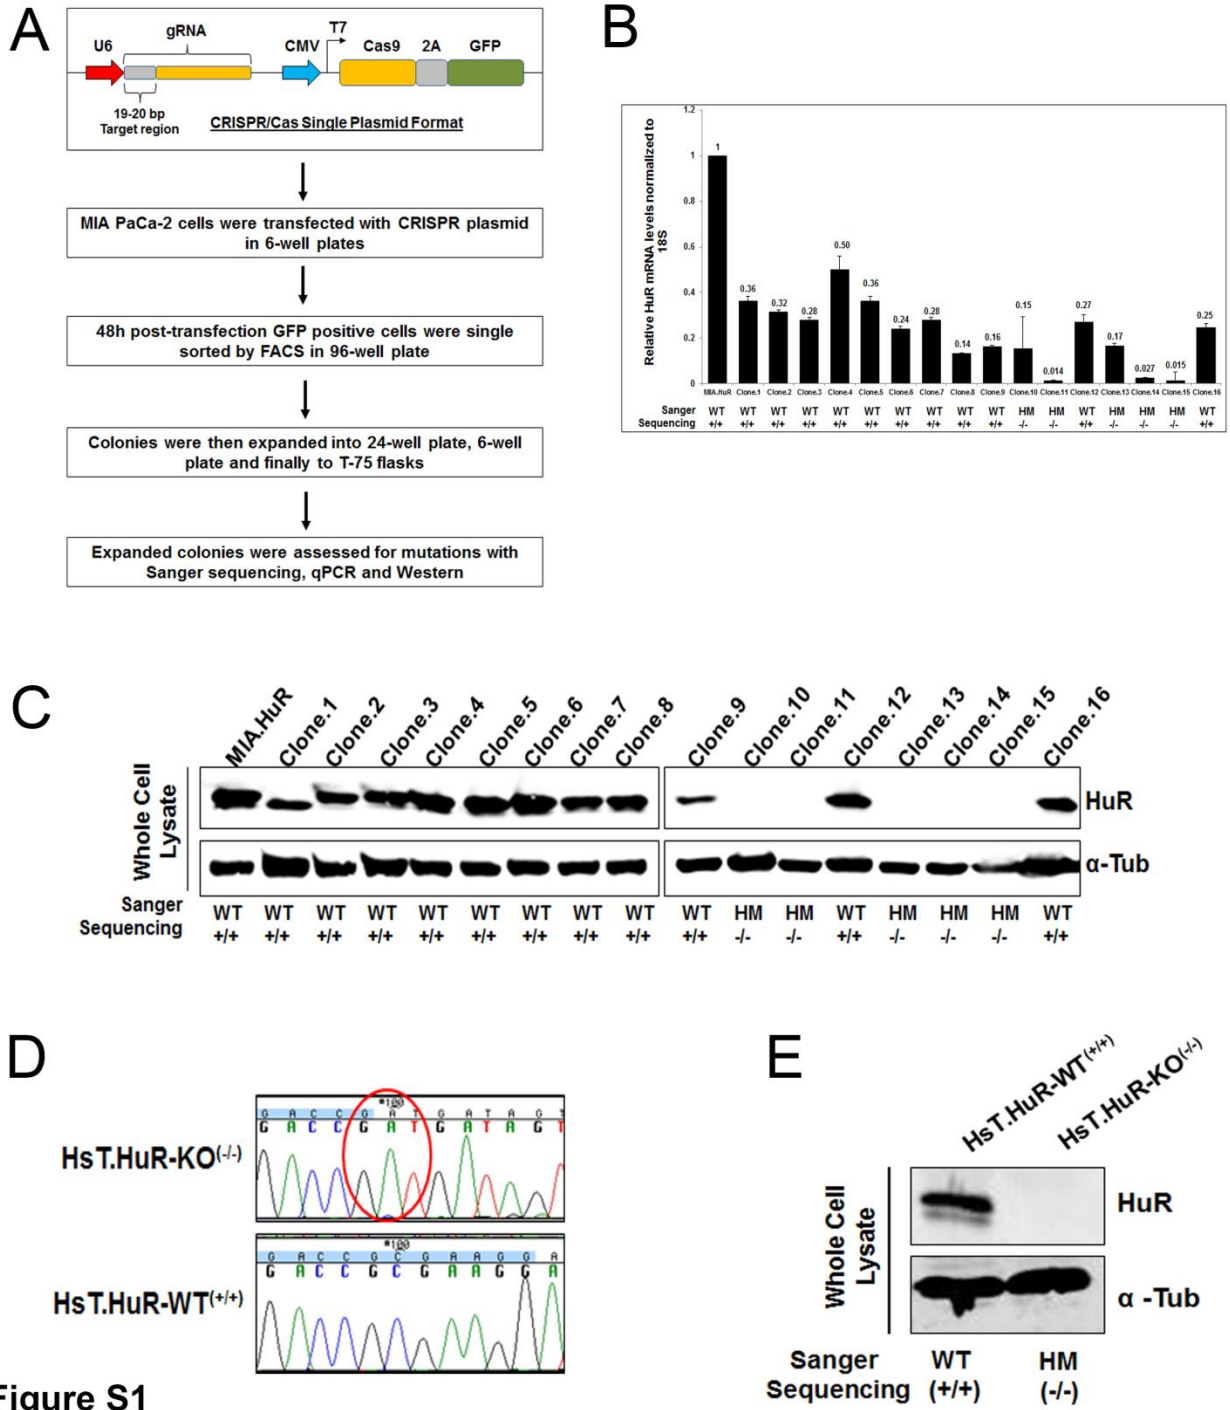

Figure S1

**Figure S2: *HuR* inhibition sensitizes cells to drugs.** Drug sensitivity (7-day short-term cell survival) on MIA.HuR.WT<sup>(+/+)</sup>, MIA.HuR.KO<sup>(+/+)</sup> and MIA.HuR.KO<sup>(-/-)</sup> using A, mitomycin C (MMC) and B, Glucose deprivation (low glucose). C and D, MIA.HuR.WT<sup>(+/+)</sup> and MIA.HuR.KO<sup>(-/-)</sup> cells ability to transform from 2D to 3D cultures (i.e., organoids). Error Bars: 95% CI.

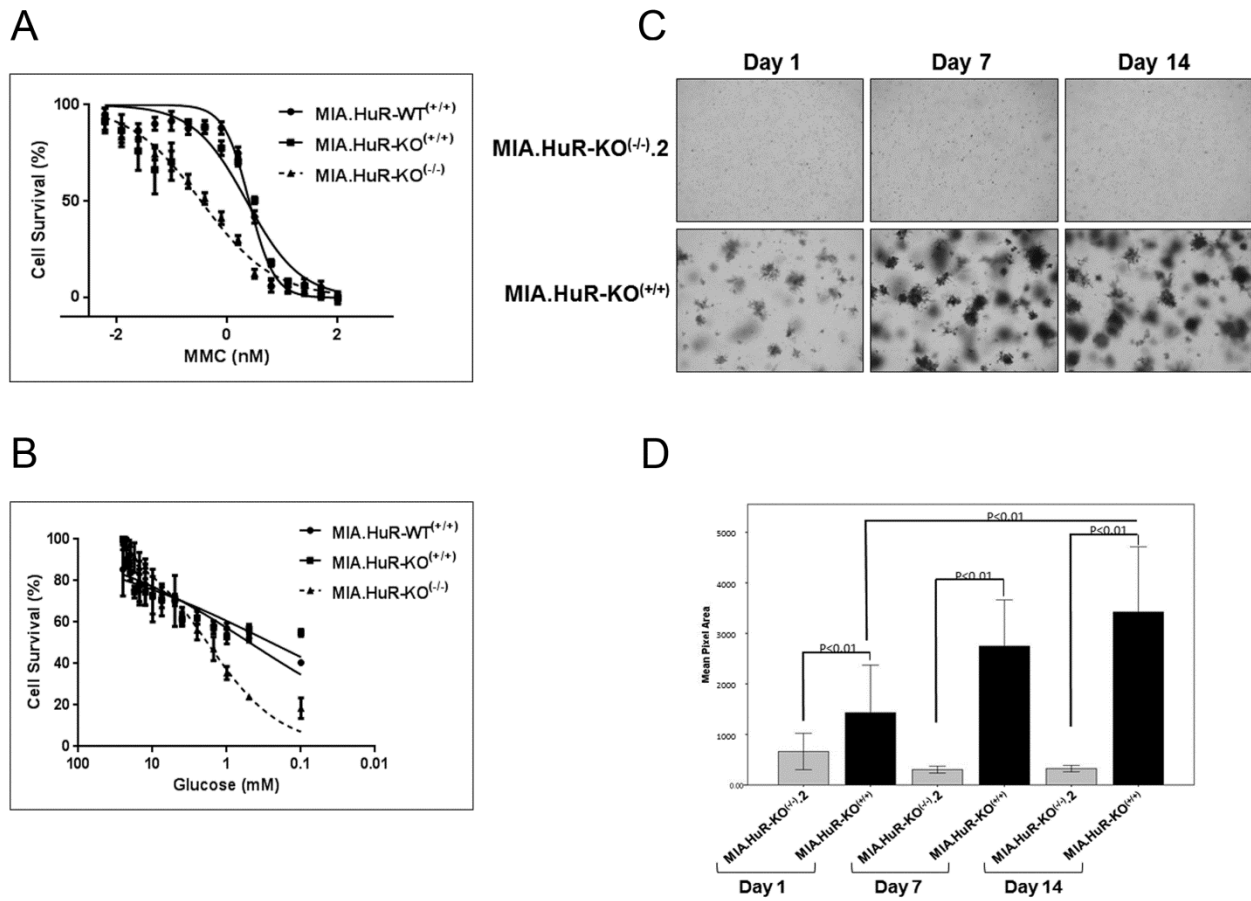

**Figure S2**

**Figure S3: PDA xenografts with HuR inhibition failed to form tumors.** A, Representative images of subcutaneous tumors on the flanks of nude female mice and their corresponding excised tumors (day 46). B, Tumor growth curves of MIA.HuR.WT<sup>(+/+)</sup>, MIA.HuR.KO<sup>(+/+)</sup>, MIA.HuR.KO<sup>(-/-)</sup>.1 and MIA.HuR.KO<sup>(-/-)</sup>.2 xenografts in nude mice. Data represent means  $\pm$  SEM of  $n = 5$ . ns, non-significant, \* $p < 0.001$ , \*\* $p < 0.0003$ .

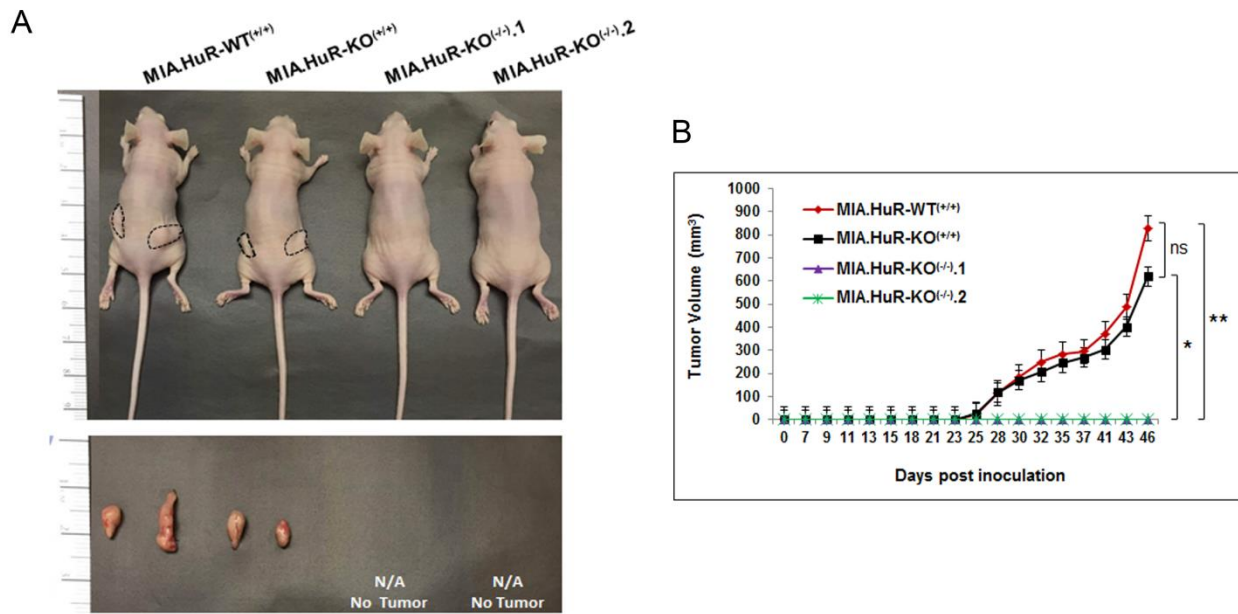

Figure S3

**Table S1:** Lists the three guide RNAs used to generate CRISPR knockout of HuR in MIA PaCa-2 and Hs 766T cell lines.

| Gene Name               | RefSeq ID | Exon Position | Nucleotide position in RefSeq | Guide RNA Sequence | Strand              |
|-------------------------|-----------|---------------|-------------------------------|--------------------|---------------------|
| ELAVL1<br>(Guide RNA 1) | NM_001419 | 2             | 188                           | GCCGAAGACTGCAGG    | 5'-N19NGG_sense     |
| ELAVL1<br>(Guide RNA 2) | NM_001419 | 2             | 263                           | CCAGGATGAGTTACG    | 5'-N19NGG_antisense |
| ELAVL1<br>(Guide RNA 3) | NM_001419 | 3             | 363                           | ACGTGACCGCGAAGG    | 5'-N19NGG_sense     |

**Table S2:** Lists the primers used to detect the mutation created by all three guide RNAs in CRISPR knockout of HuR MIA PaCa-2 and Hs 766T cell lines.

| Primers               | Sequence                 |
|-----------------------|--------------------------|
| Guide RNA 1-Forward-1 | TTGGGAACTTATGTCCGATCT    |
| Guide RNA 1-Reverse-1 | GCAGTTACTAGTTTTGCCTTCATA |
| Guide RNA 1-Forward-2 | CGATCAAATTCGTTCTCCCG     |
| Guide RNA 1-Reverse-2 | GCATAGAAAAGAATCTCTAAGTGC |
| Guide RNA 2-Forward-1 | CACGTGGGACCCAATCAATC     |
| Guide RNA 2-Reverse-1 | GTGACATCGGGAGAACGAAT     |
| Guide RNA 3-Forward-1 | GAGCTGACGCAACCTGG        |
| Guide RNA 3-Reverse-1 | AAGGCCAGGCAGATATAGTG     |
| Guide RNA 3-Forward-2 | CACTCATGTAAGGCCTGGGT     |
| Guide RNA 3-Reverse-2 | GGAACCTGTGTTTCATTGCAGA   |
| Guide RNA 3-Forward-3 | TTTACTGTCTGCACCCCGA      |
| Guide RNA 3-Reverse-3 | CCTCACTCGCAGACGGTTG      |

**Table S3:** Lists the clones along with their genotypes obtained for all three guide RNAs. All mutations were confirmed by Sanger sequencing. Wild Type: No mutation in both the alleles; and Homozygous Mutant: Both alleles have either same or different mutations.

|                    |   | <b>Clone</b> | <b>Genotype</b>         |
|--------------------|---|--------------|-------------------------|
| <b>Guide RNA 1</b> | } | Clone.1      | Wild Type (+/+)         |
|                    |   | Clone.2      | Wild Type (+/+)         |
|                    |   | Clone.3      | Wild Type (+/+)         |
|                    |   | Clone.4      | Wild Type (+/+)         |
| <b>Guide RNA 2</b> | } | Clone.5      | Wild Type (+/+)         |
|                    |   | Clone.6      | Wild Type (+/+)         |
|                    |   | Clone.7      | Wild Type (+/+)         |
|                    |   | Clone.8      | Wild Type (+/+)         |
| <b>Guide RNA 3</b> | } | Clone.9      | Wild Type (+/+)         |
|                    |   | Clone.10     | Homozygous Mutant (-/-) |
|                    |   | Clone.11     | Homozygous Mutant (-/-) |
|                    |   | Clone.12     | Wild Type (+/+)         |
|                    |   | Clone.13     | Homozygous Mutant (-/-) |
|                    |   | Clone.14     | Homozygous Mutant (-/-) |
|                    |   | Clone.15     | Homozygous Mutant (-/-) |
|                    |   | Clone.16     | Wild Type (+/+)         |



**Table S4:** Lists the cell lines produced along with their mutations and chromatograms obtained through Sanger sequencing. WT: Wild Type - No mutation in both the alleles.

| Cell Lines                                                 | HGVS Nomenclature                                                                                                                          | Sequence Chromatogram |
|------------------------------------------------------------|--------------------------------------------------------------------------------------------------------------------------------------------|-----------------------|
| MIA PaCa2:<br>MIA.HuR-KO <sup>(+/+)</sup><br>(Clone.4)     | NM_001419 <sup>[WT]</sup>                                                                                                                  |                       |
| MIA PaCa2:<br>MIA.HuR-KO <sup>(-/-)</sup> .1<br>(Clone.11) | NM_001419[c.211delCG];[c.211delCG]                                                                                                         |                       |
| MIA PaCa2:<br>MIA.HuR-KO <sup>(-/-)</sup> .2<br>(Clone.14) | NM_001419[c.204delGTGACCGGA];[c.206delGACCGGAAGGATGCAG]                                                                                    |                       |
| Hs 766T:<br>HsT.HuR-KO <sup>(-/-)</sup>                    | NM_001419[c.211_212insATGATAGTCCATTTTAA<br>AACATAATTTTAAACTGCAAACACTAC];<br>[c.211_212insATGATAGTCCATTTTAAACATAATTTTAA<br>AACTGCAAACACTAC] |                       |
